# Supplementary material for: Interactive real-time mapping and catheter ablation of the cavotricuspid isthmus guided by magnetic resonance imaging in a porcine model
Source: PubMed Central journal article supplement — Eur Heart J. 2009 Nov 5;31(4):450–6. doi: 10.1093/eurheartj/ehp460 (PMC2821629; doi:10.1093/eurheartj/ehp460), 2009-11-05
Supplement: ehp460_1.pdf [file ehp460_1.pdf]

## **Supplemental Files**

**Video 1:** Real-Time movie shows different scanning planes during RFC ablation in the cavotricuspid isthmus. Cardiac, respiratory and blood flow are clearly visible.

**Video 2:** Real-Time movie shows the occurrence of ventricular premature beats (0:33 sec. frametime) leading to ventricular fibrillation (0:40 sec. frametime) during RFC ablation (the ablation catheter is visible in the septal region of the right atrium.). Although ablation was performed in the right atrium, ventricular arrhythmia occurred.
